# Supplementary material
Source: publisher figshare collection journal article supplement (https://gsapubs.figshare.com/ndownloader/files/23307170)
Supplement: Supplementary file 1 [file 23307170]

# Supplementary Information

## *Overwriting of sedimentary magnetism by bacterially mediated mineral alteration*

**Yael Ebert<sup>1\*</sup>, Ron Shaar<sup>1</sup>, Simon Emmanuel<sup>1</sup>, Norbert Nowaczyk<sup>2</sup>, and Mordechai Stein<sup>1,3</sup>**

<sup>1</sup>The Institute of Earth Sciences, The Hebrew University of Jerusalem, Jerusalem 91904, Israel

<sup>2</sup>Helmholtz Centre Potsdam, GFZ German Research Centre for Geosciences, 14473 Potsdam, Germany

<sup>3</sup>Geological Survey of Israel, Jerusalem, 95501, Israel

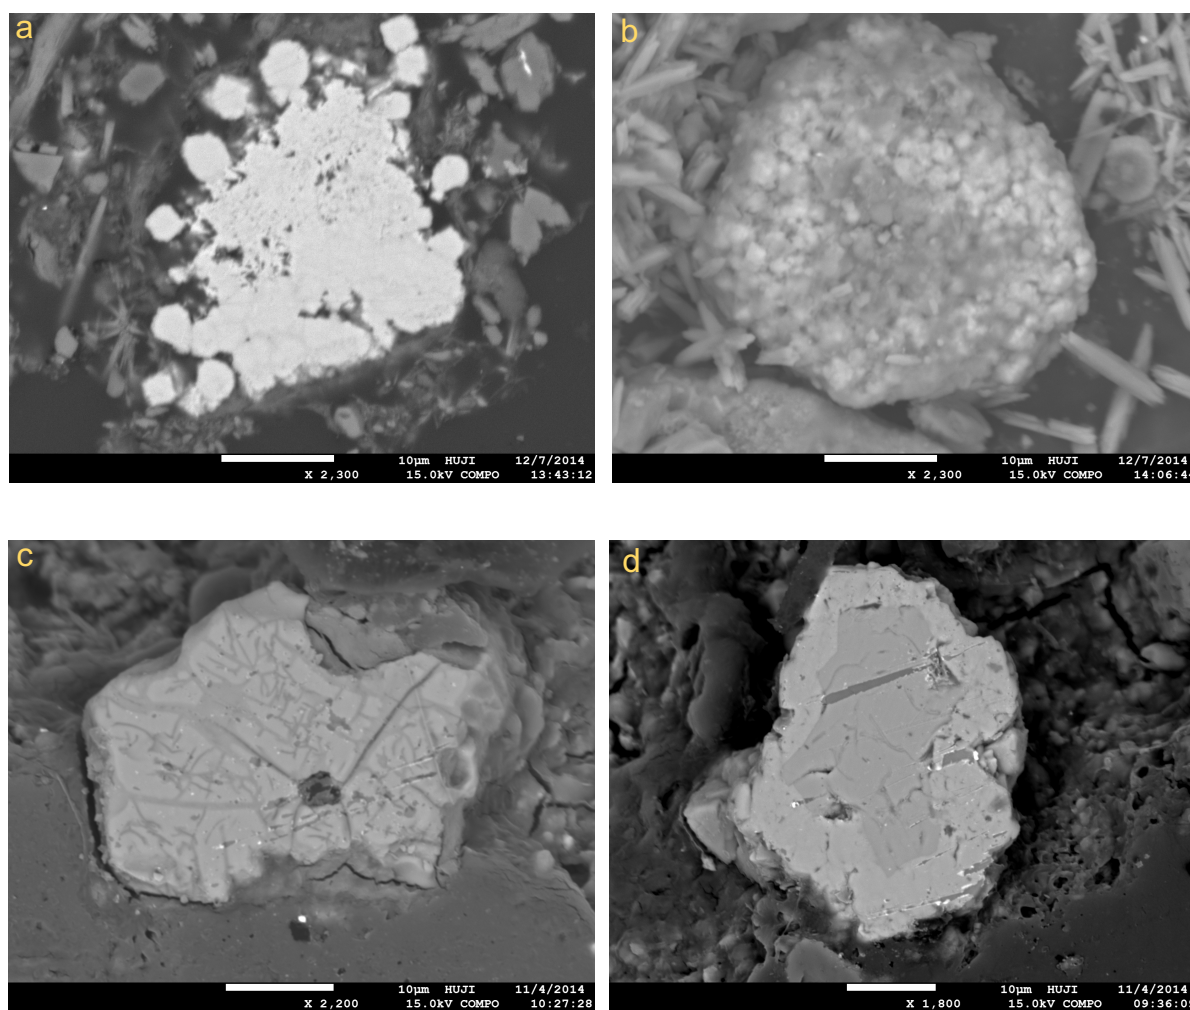

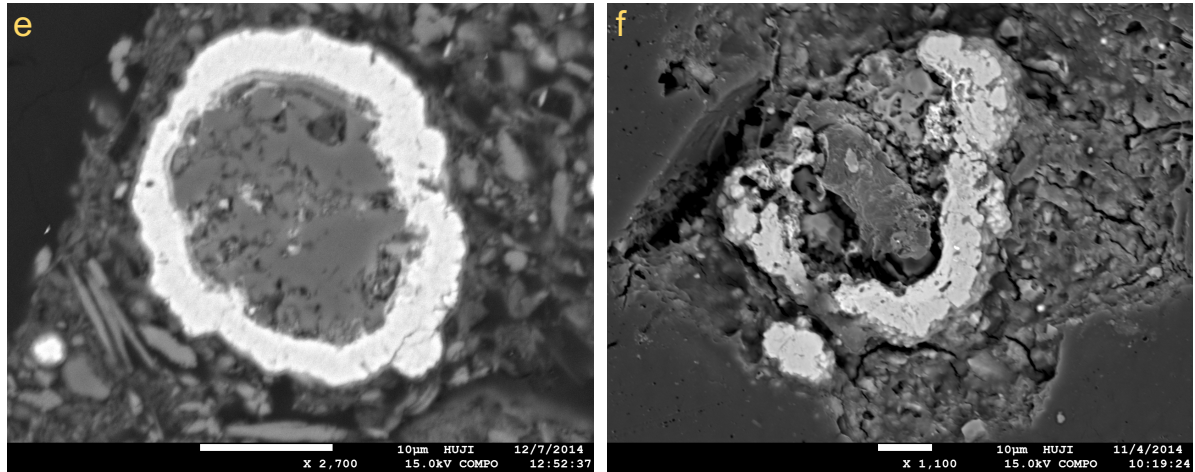

Figure DR1: Backscattered electron images of magnetic extracts from the Lisan Fm. (Last glacial). a) Framboidal pyrite overgrown by euhedral pyrite. b) Framboidal pyrite. c) Partially dissolved titanomagnetite. d) Pyrite overgrown on a partially dissolved titanomagnetite. e-f) Pyrite.

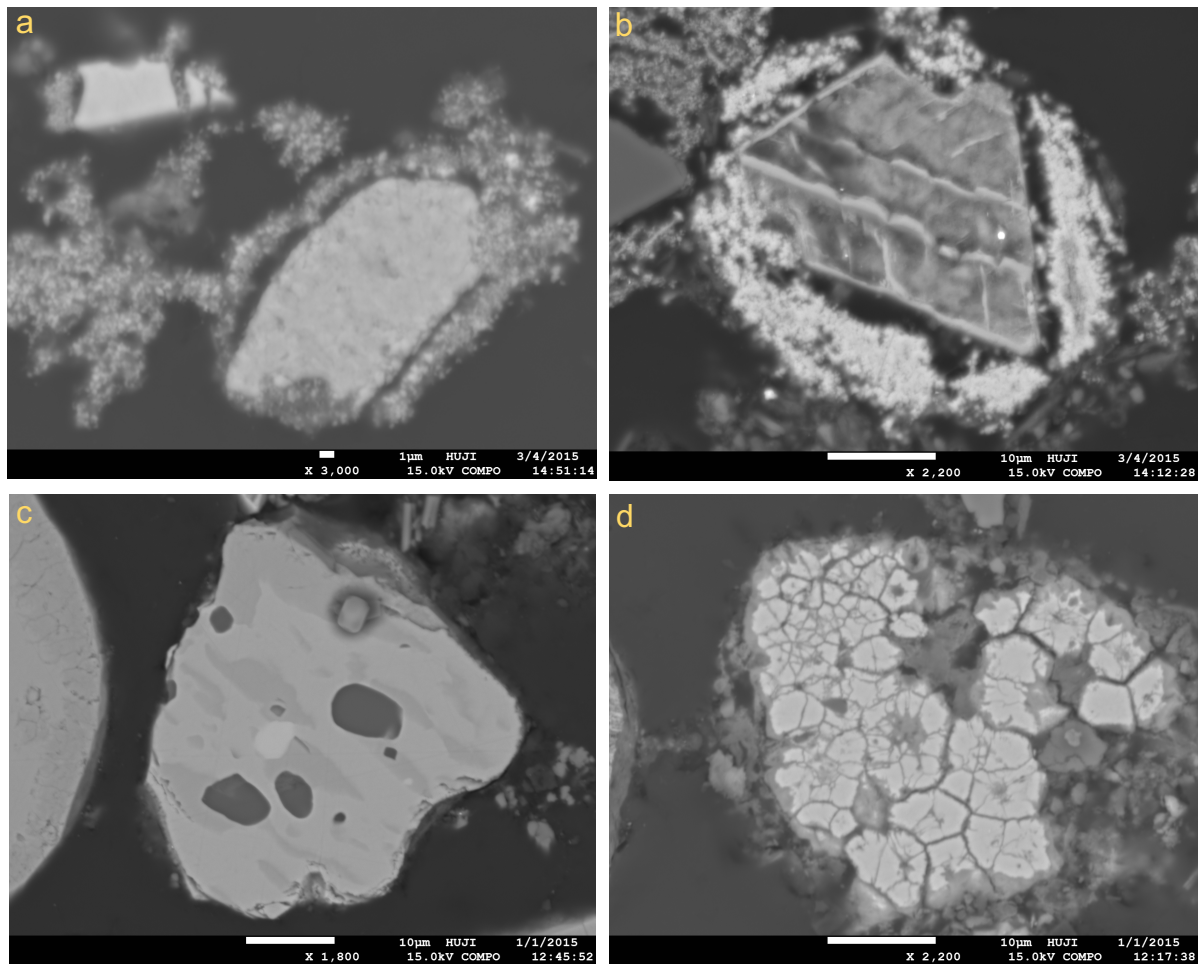

Figure DR2: Backscattered electron images of magnetic extracts from the Ze'elim Formation (Holocene). a-b) Titanomagnetite with rims of greigite. c) Undissolved titanomagnetite. d) Greigite.

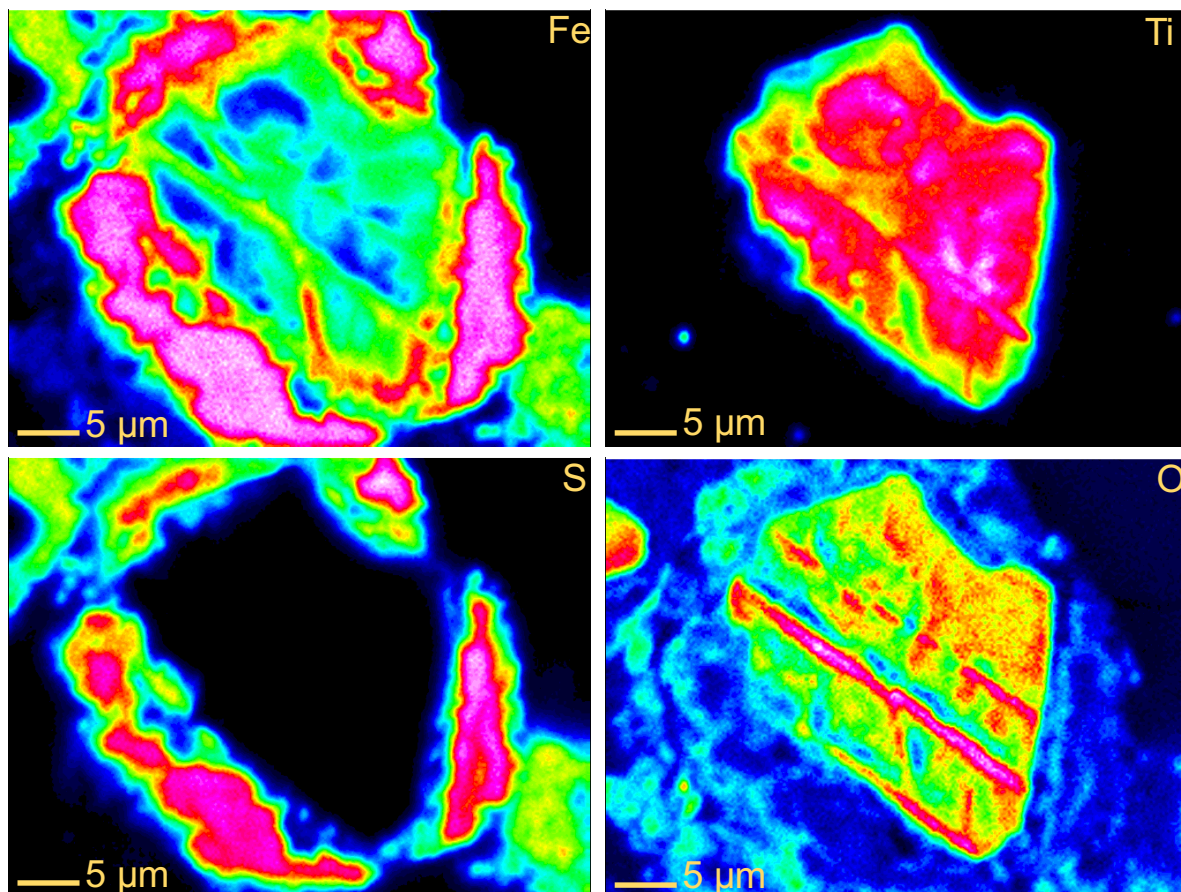

Figure DR3: WDS color mapping of the grain shown in figure DR2b. Each image represents the relative distribution of one of the elements: Fe, Ti, S, O.
